# Supplementary material for: Overexpressed HDAC4 is associated with poor survival and promotes tumor progression in esophageal carcinoma
Source: PubMed Central journal article supplement (PMC4931829; doi:10.18632/aging.100980), 2016-06-13
Supplement: aging-08-1236-s001.pdf [file aging-08-1236-s001.pdf]

SUPPLEMENTARY FIGURE

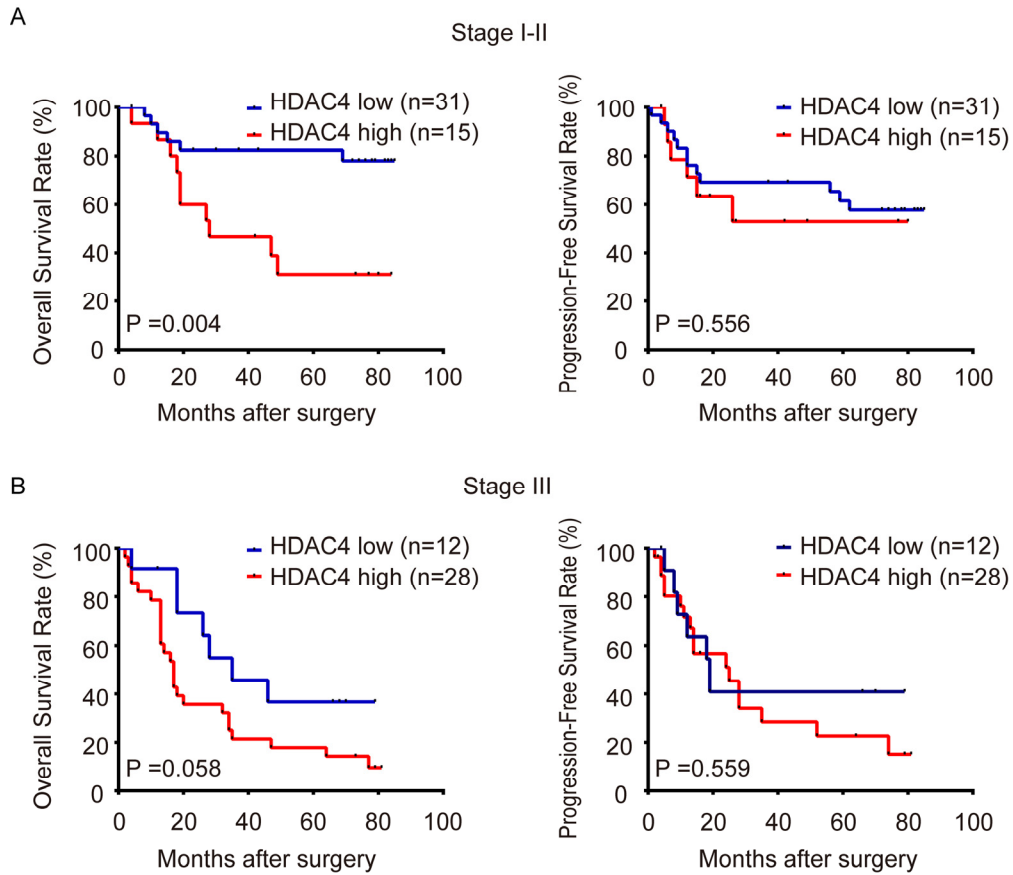

**Figure S1. HDAC4 overexpression is associated with poor prognosis for patients with ESCC independent of clinical stage. (A)** The overall survival (OS) and progression-free survival (PFS) of stage I-II ESCC patients with high or low HDAC4 expression. **(B)** OS and PFS of stage III ESCC patients with high or low HDAC4 expression.
